# Supplementary material for: Recombination in the Human Pseudoautosomal Region PAR1
Source: PubMed Central journal article supplement (PMC4102438; doi:10.1371/journal.pgen.1004503), 2014-07-17

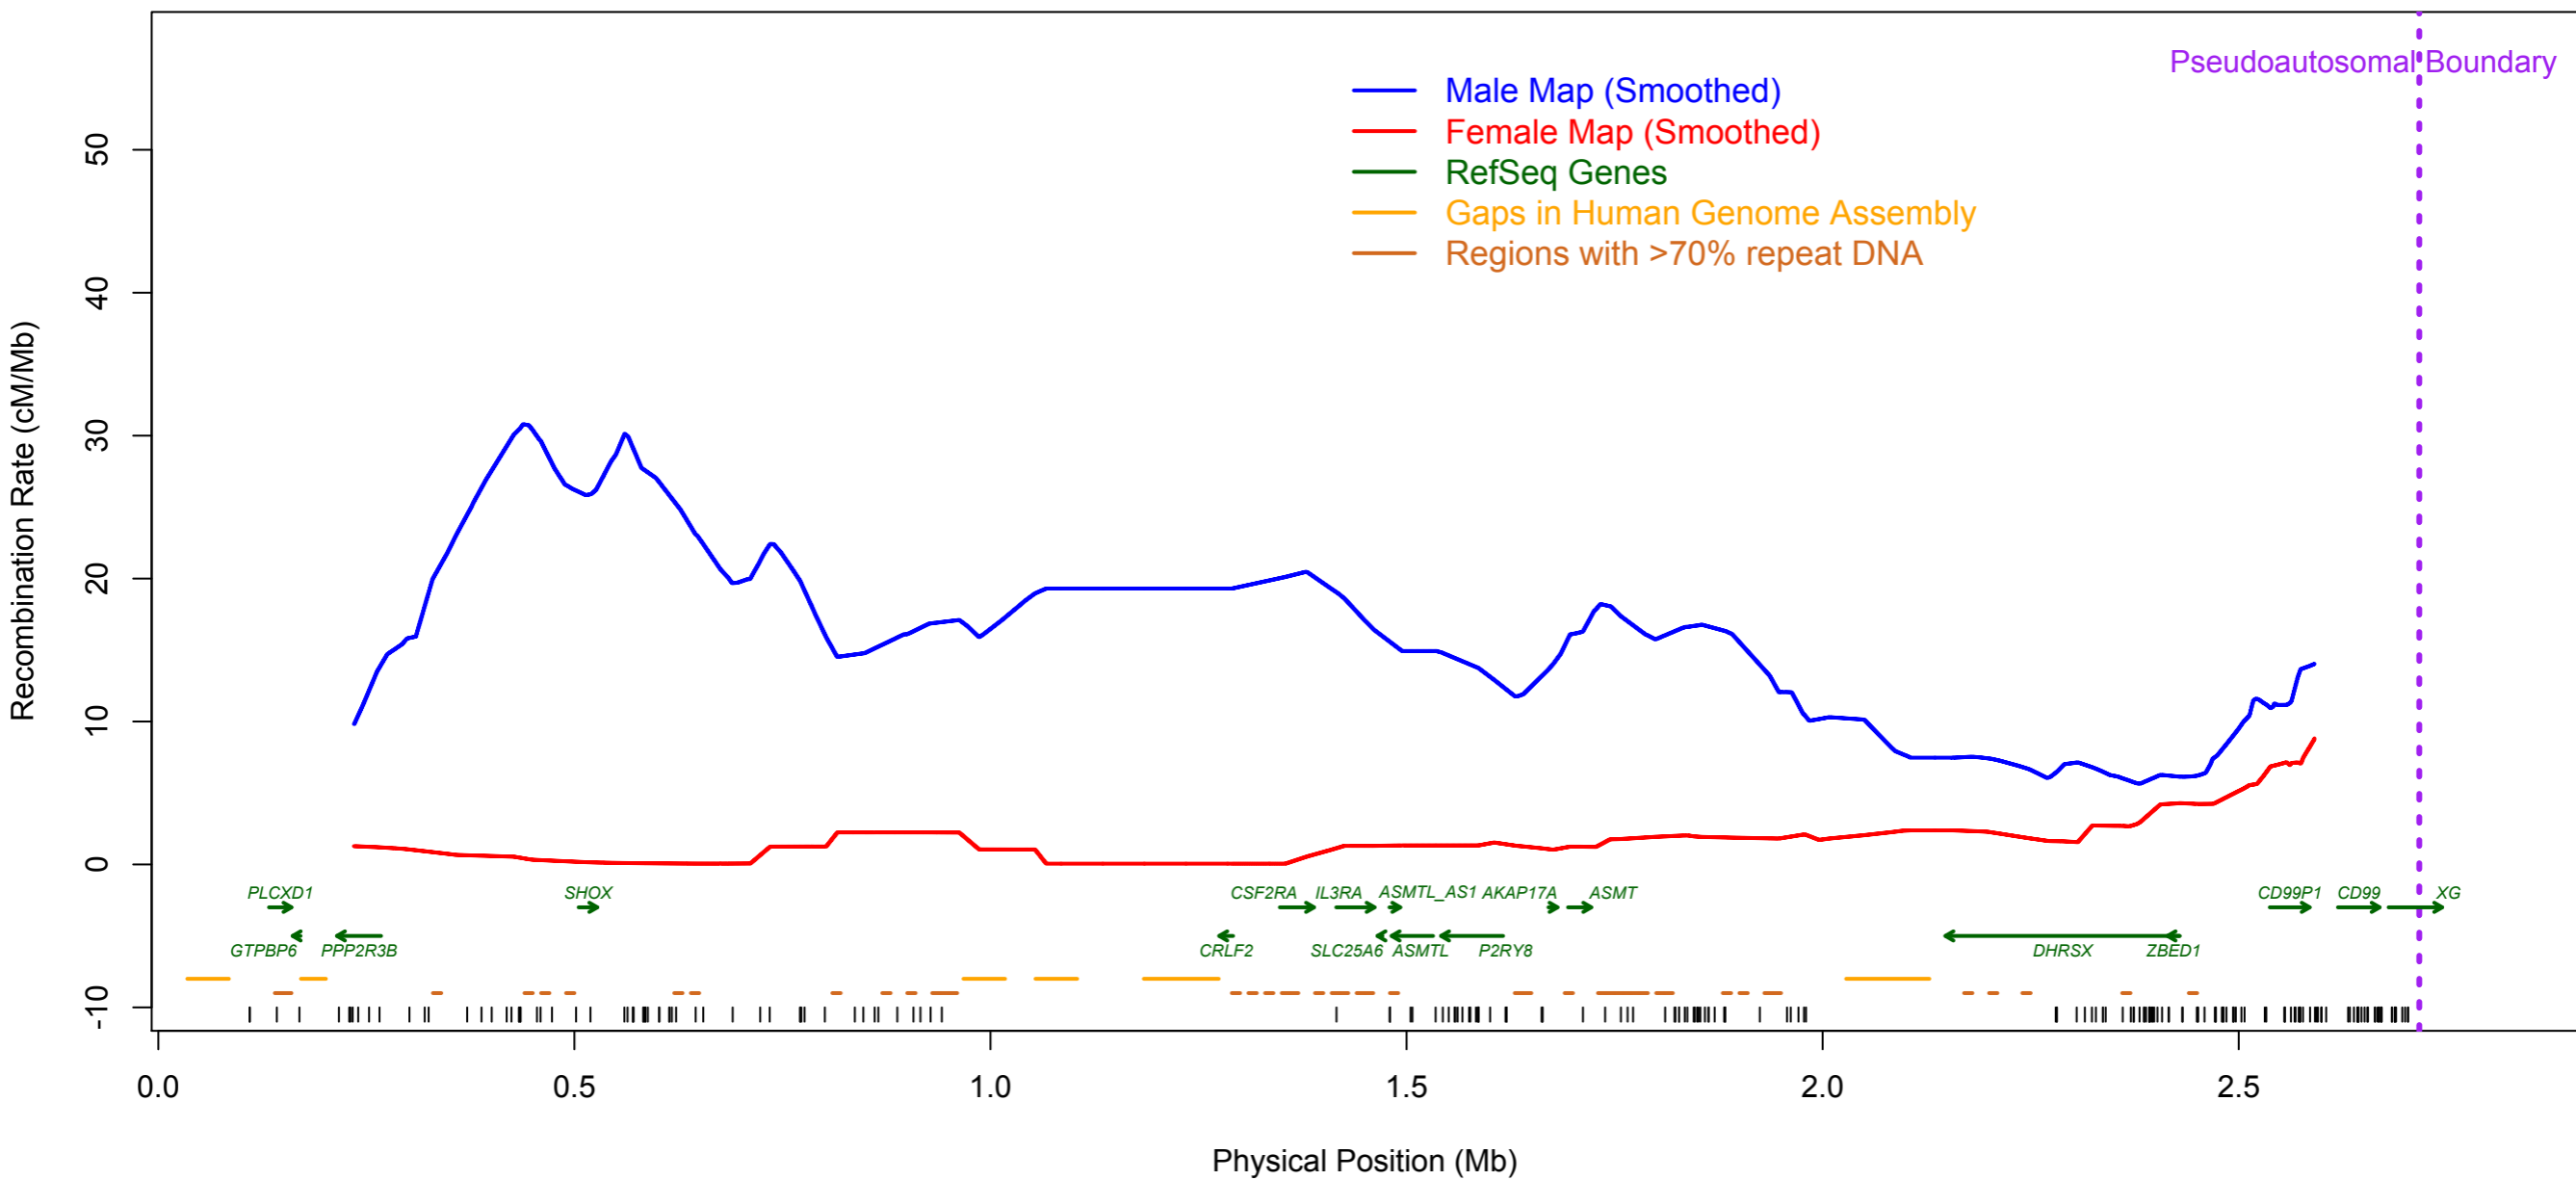

Supplement: pgen.1004503.s001.pdf [file pgen.1004503.s001.pdf]
