# Supplementary material for: Recombination in the Human Pseudoautosomal Region PAR1
Source: PubMed Central journal article supplement (PMC4102438; doi:10.1371/journal.pgen.1004503), 2014-07-17
Supplement: pgen.1004503.s008.pdf [file pgen.1004503.s008.pdf]

| Resolution   | #Paternal Events | #Maternal Events |
|--------------|------------------|------------------|
| < 10 kb      | 0                | 0                |
| 10 – 20 kb   | 3                | 1                |
| 20 – 50 kb   | 15               | 5                |
| 50 – 100 kb  | 23               | 4                |
| 100 – 200 kb | 27               | 3                |
| 200 – 500 kb | 23               | 3                |
| > 500 kb     | 35               | 1                |
| Total        | 126              | 17               |

Table S1: Resolution of paternal and maternal crossovers that have both end-points mapping into our region of marker coverage
