# Supplementary material for: Recombination in the Human Pseudoautosomal Region PAR1
Source: PubMed Central journal article supplement (PMC4102438; doi:10.1371/journal.pgen.1004503), 2014-07-17
Supplement: pgen.1004503.s009.pdf [file pgen.1004503.s009.pdf]

|                 | Male (cM) | Female (cM) |
|-----------------|-----------|-------------|
| 200 kb – 700 kb | 11.9      | 0.25        |
| 700 kb – 1.2 Mb | 8.5       | 0.58        |
| 1.2 Mb – 1.7 Mb | 8.4       | 0.35        |
| 1.7 Mb – 2.2 Mb | 6.2       | 1.1         |
| 2.2 Mb – 2.7 Mb | 5.1       | 2.4         |

Table S2: Male and female broad-scale rates in PAR1. The sub-telomeric 200 kb were removed due to low power to identify crossovers.
