# Supplementary material for: Recombination in the Human Pseudoautosomal Region PAR1
Source: PubMed Central journal article supplement (PMC4102438; doi:10.1371/journal.pgen.1004503), 2014-07-17
Supplement: pgen.1004503.s010.pdf [file pgen.1004503.s010.pdf]

|                 | 200 kb – 700 kb | 700 kb – 1.2 Mb | 1.2 Mb – 1.7 Mb | 1.7 Mb – 2.2 Mb      | 2.2 Mb – 2.7 Mb      |
|-----------------|-----------------|-----------------|-----------------|----------------------|----------------------|
| 200 kb – 700 kb | 11.9 cM         | 0.039           | 0.033           | $1.8 \times 10^{-3}$ | $4.0 \times 10^{-4}$ |
| 700 kb – 1.2 Mb |                 | 8.5 cM          | 0.48            | 0.059                | 0.021                |
| 1.2 Mb – 1.7 Mb |                 |                 | 8.4 cM          | 0.07                 | 0.029                |
| 1.7 Mb – 2.2 Mb |                 |                 |                 | 6.2 cM               | 0.25                 |
| 2.2 Mb – 2.7 Mb |                 |                 |                 |                      | 5.1 cM               |

Table S3: This table shows the evidence for a *decrease in rate away from the telomere* in the *male* PAR1. The diagonal elements report the estimated rate in each region. The other cells report the p-value of testing the null hypothesis  $r_i = r_j$ , against  $r_i > r_j$  for row  $i$  and column  $j$ , where  $r_i$  and  $r_j$  are the broad-scale rates in the corresponding regions. The p-values were estimated using 5000 bootstrap samples over the set of fathers included in the map.
