# Supplementary material for: Recombination in the Human Pseudoautosomal Region PAR1
Source: PubMed Central journal article supplement (PMC4102438; doi:10.1371/journal.pgen.1004503), 2014-07-17
Supplement: pgen.1004503.s011.pdf [file pgen.1004503.s011.pdf]

|                 | 200 kb – 700 kb | 700 kb – 1.2 Mb | 1.2 Mb – 1.7 Mb | 1.7 Mb – 2.2 Mb | 2.2 Mb – 2.7 Mb      |
|-----------------|-----------------|-----------------|-----------------|-----------------|----------------------|
| 200 kb – 700 kb | 0.25 cM         | 0.22            | 0.42            | 0.03            | $4.0 \times 10^{-4}$ |
| 700 kb – 1.2 Mb |                 | 0.58 cM         | 0.61            | 0.22            | 0.01                 |
| 1.2 Mb – 1.7 Mb |                 |                 | 0.35 cM         | 0.10            | 0.003                |
| 1.7 Mb – 2.2 Mb |                 |                 |                 | 1.1 cM          | 0.05                 |
| 2.2 Mb – 2.7 Mb |                 |                 |                 |                 | 2.4 cM               |

Table S4: This table shows the evidence for an *increase in rate near the pseudoautosomal boundary* in the *female* PAR1. The diagonal elements report the estimated rate in each region. The other cells report the p-value of testing the null hypothesis  $r_i = r_j$ , against  $r_i < r_j$  for row  $i$  and column  $j$ , where  $r_i$  and  $r_j$  are the broad-scale rates the corresponding regions. The p-values were estimated using 5000 bootstrap samples over the set of mothers included in the map.
