# Supplementary material for: Recombination in the Human Pseudoautosomal Region PAR1
Source: PubMed Central journal article supplement (PMC4102438; doi:10.1371/journal.pgen.1004503), 2014-07-17
Supplement: pgen.1004503.s012.pdf [file pgen.1004503.s012.pdf]

| Type of substitution |       | Effect Size      | P-value            |
|----------------------|-------|------------------|--------------------|
| Chimpanzee           | Human | (Non-repeat DNA) | (Non-repeat DNA)   |
| AT                   | GC    | 8.5              | $1 \times 10^{-4}$ |
| GC                   | CG    | 6.1              | 0.02               |
| GC content fraction  |       | -15.5            | 0.08               |
| CpG content fraction |       | 39.1             | 0.12               |
| Intercept            |       | 8.5              | 0.02               |

Table S5: Genetic maps can be built using substitution patterns between closely related species: this table reports the optimal linear model for predicting hotspot heat in cM/Mb while preventing over-fitting of data (using the AIC criterion for model selection) for predicting hotspot heat. The regressors allowed in the step-wise search were GC-content fraction, CpG content fraction and the divergence rate for each category of substitution. The  $R^2$  of this model is 23% in unique DNA.
